# Supplementary material for: Cost-effective CuO nanotube electrodes for energy storage and non-enzymatic glucose detection
Source: Royal Society of Chemistry journal article supplement (doi:10.1039/c4ra08230c), 2014-01-01
Supplement: c4ra08230c1.pdf [file c4ra08230c1.pdf]

## Supporting information

### Cost-Effective CuO Nanotube Electrodes for Energy Storage and Nonenzymatic Glucose Detection

Yang Lu,<sup>a,b,c</sup> Kangwen Qiu,<sup>a,b</sup> Deyang Zhang,<sup>a,b,d</sup> Jing Lin,<sup>c</sup> Xianming Liu,<sup>e</sup> Chengchun Tang,<sup>\*c</sup> Jang-Kyo Kim,<sup>f</sup> Yongsong Luo,<sup>\*a,b</sup>

<sup>a</sup>School of Physics and Electronic Engineering, Xinyang Normal University, Xinyang 464000, P. R. China.

<sup>b</sup>Key Laboratory of Advanced Micro/Nano Functional Materials, Xinyang Normal University, Xinyang 464000, P. R. China.

<sup>c</sup>School of Material Science and Engineering, Hebei University of Technology, Tianjin 300130, P.R.China.

<sup>d</sup>School of Materials Science and Technology, China University of Geosciences, Beijing 100083, P. R. China.

<sup>e</sup>College of Chemistry and Chemical Engineering, Luoyang Normal University, Luoyang 471022, P. R. China.

<sup>f</sup>Department of Mechanical and Aerospace Engineering, The Hong Kong University of Science and Technology, Clear Water Bay, Kowloon, Hong Kong, P. R. China.

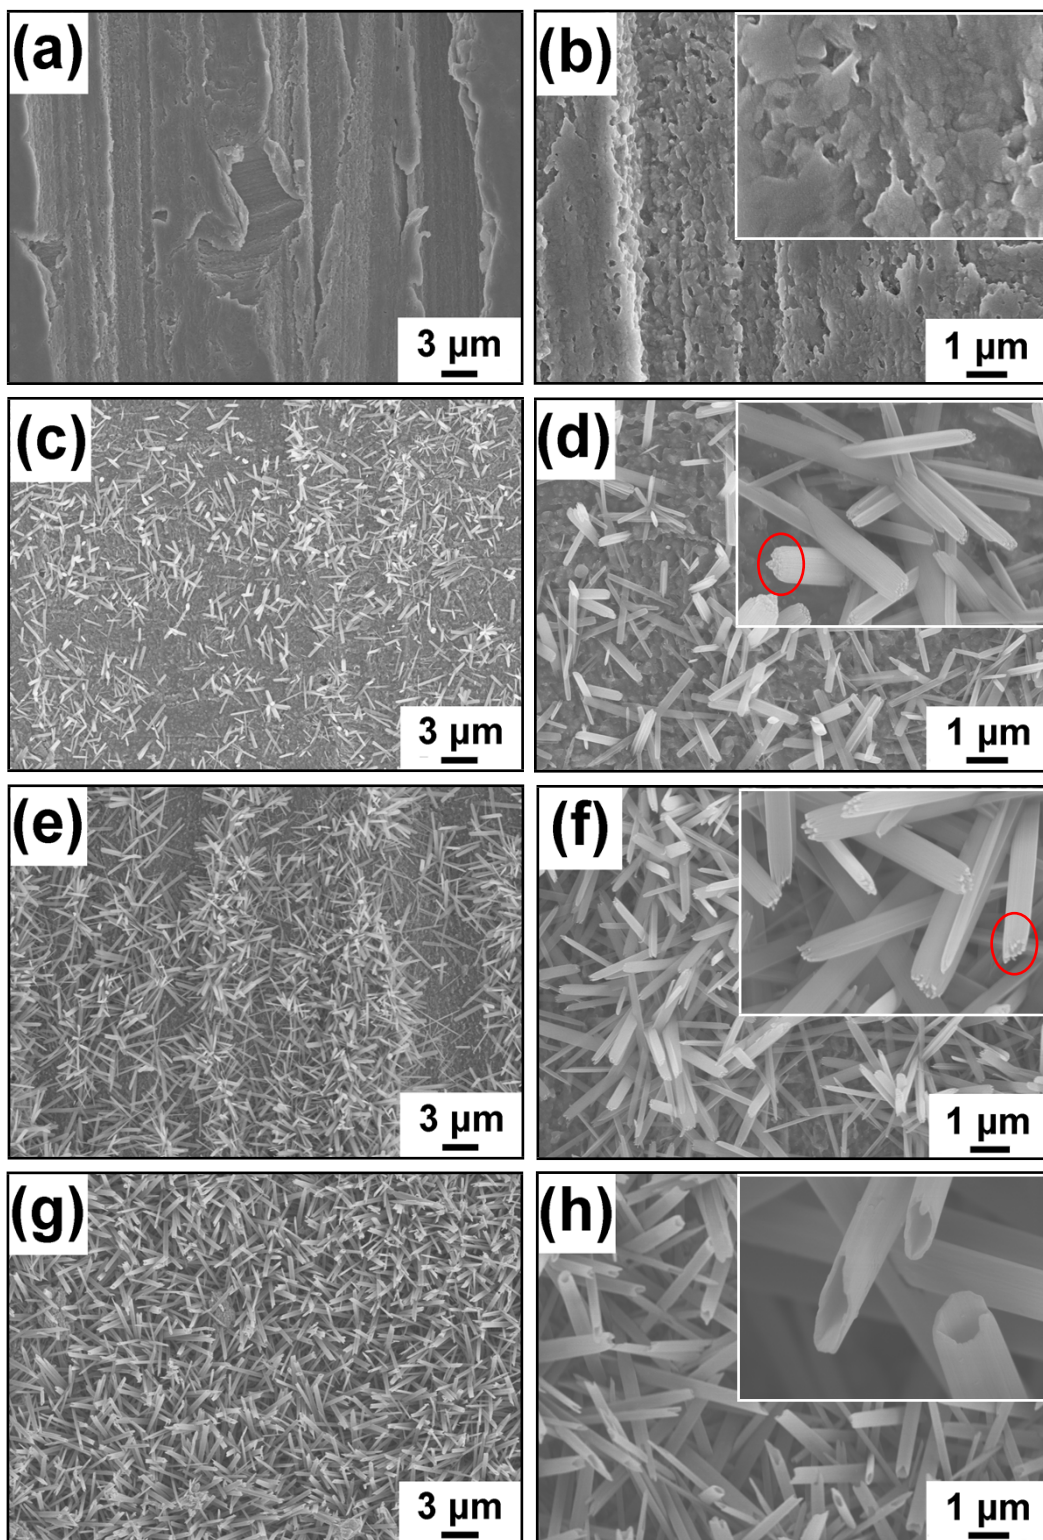

**Fig. S1** FESEM images taken at different stages of  $\text{Cu}(\text{OH})_2$  nanotube growth on a Cu foil: (a, b) 0 s; (c, d) 5 min; (e, f) 10 min; and (g, h) 20 min.

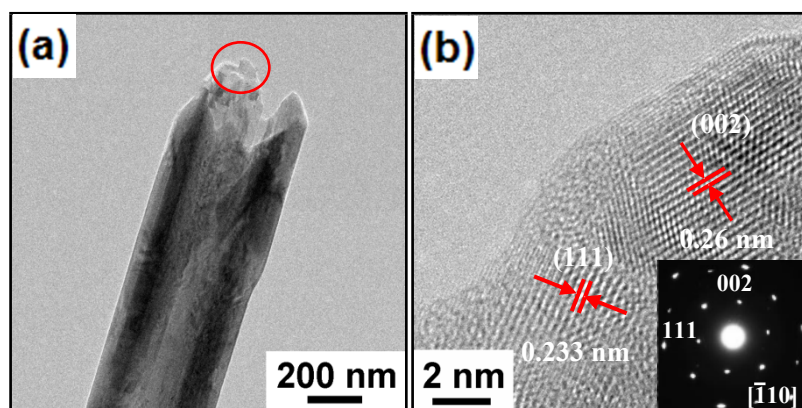

**Fig. S2** (a) TEM image and (b) lattice fringes of a CuO nanotube with the corresponding selected area electron diffraction (SAED) pattern (inset).

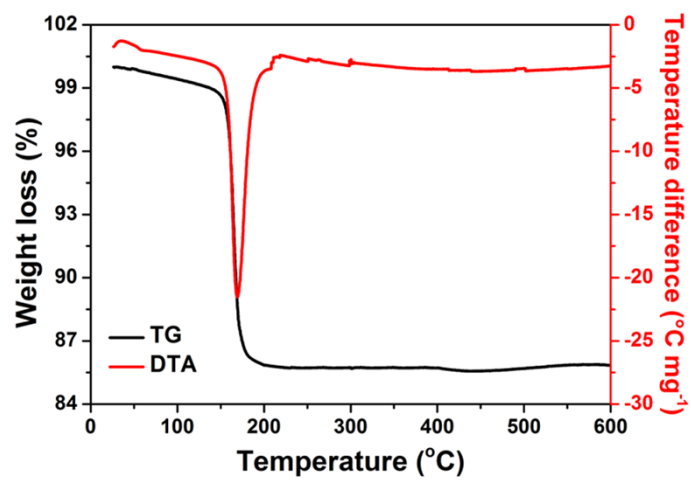

Fig. S3 TG and DTA curves of as-prepared Cu(OH)<sub>2</sub> precursor.

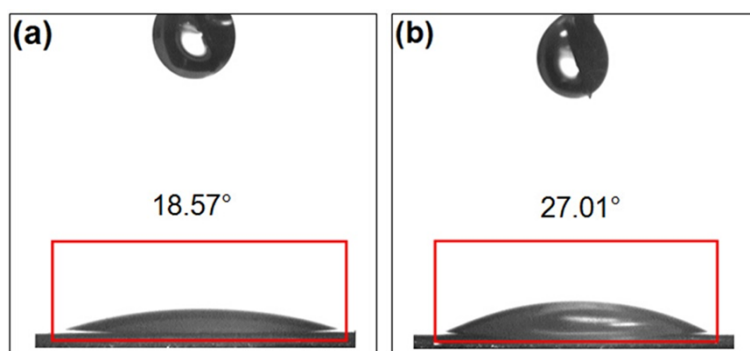

**Fig. S4** Photographs and corresponding contact angles of water droplets on the surfaces of (a)  $\text{Cu}(\text{OH})_2$  and (b)  $\text{CuO}$  nanotubes.

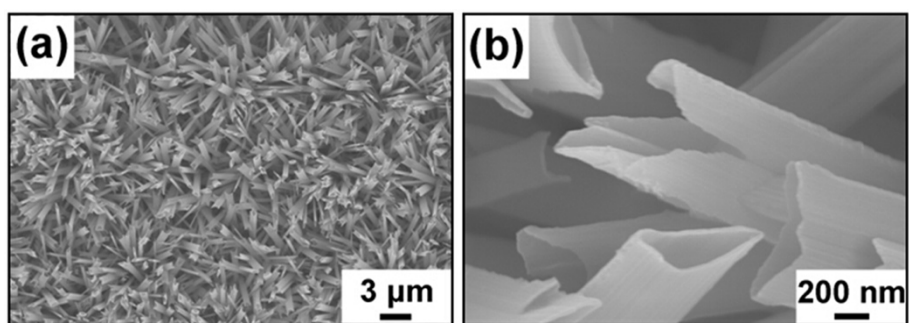

**Fig. S5** FESEM images of CuO nanotube electrode after 5000 discharge/charge cycles at  $1 \text{ A g}^{-1}$ .

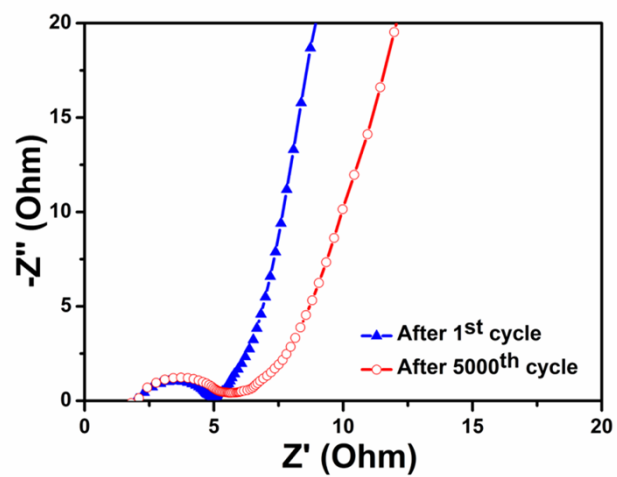

**Fig. S6** Electrochemical impedance spectra of CuO nanotube electrode after 1<sup>st</sup> and 5000<sup>th</sup> cycles.

**Table S1** Internal resistance ( $R_s$ ) and charge transfer resistance ( $R_{ct}$ ) of synthesized composites.

| Materials                     | $R_{ct}$ ( $\Omega$ ) | $R_s$ ( $\Omega$ ) |
|-------------------------------|-----------------------|--------------------|
| Cu(OH) <sub>2</sub> nanotubes | 5.11                  | 2.79               |
| CuO nanotubes                 | 3.09                  | 1.71               |

**Table S2** Internal resistance ( $R_s$ ) and charge transfer resistance ( $R_{ct}$ ) of CuO nanotube electrode after 1<sup>st</sup> and 5000<sup>th</sup> cycles.

| Cycles             | $R_{ct}$ ( $\Omega$ ) | $R_s$ ( $\Omega$ ) |
|--------------------|-----------------------|--------------------|
| 1 <sup>st</sup>    | 3.09                  | 1.71               |
| 5000 <sup>th</sup> | 4.50                  | 1.83               |

**Table S3** Comparison of the key performance characteristics of different CuO-based electrodes for enzyme-free electro-oxidation of glucose.

| Type of electrodes | Potential (V) | Sensitivity ( $\mu\text{A mM}^{-1}\text{cm}^{-2}$ ) | Linear range (up to, mM) | Reference    |
|--------------------|---------------|-----------------------------------------------------|--------------------------|--------------|
| CuO/MWCNTs         | 0.7           | 2109                                                | 3                        | 54           |
| CuO fibers         | 0.4           | 431                                                 | 2.5                      | 55           |
| CuO nanospheres    | 0.6           | 404.5                                               | 2.6                      | 56           |
| CuO nanoparticles  | 0.55          | 1397                                                | 2.3                      | 57           |
| CuO nanotubes      | 0.5           | 2231                                                | 3                        | Current work |
